# Supplementary material
Source: MDPI journal article supplement (https://www.mdpi.com/2311-7524/9/10/1144)
Supplement: s1 [file s1]

Archive with 15 entries (15 files):
- Fig_S1_Wealthy_B118_root.jpg
- Fig_S10_P_contents_2022.jpg
- Fig_S2_N_contents_2020.jpg
- Fig_S3_N_contents_2021.jpg
- Fig_S4_N_contents_2022.jpg
- Fig_S5_P_contents_2020.jpg
- Fig_S6_P_contents_2021.jpg
- Fig_S7_K_contents_2020.jpg
- Fig_S8_K_contents_2021.jpg
- Fig_S9_K_contents_2022.jpg
- Leaf_Micronutrients_2020.xlsx
- Leaf_Micronutrients_2021.xlsx
- Leaf_Micronutrients_2022.xlsx
- Protection_system_description.pdf
- Weather_report.pdf
