# Supplementary material
Source: MDPI journal article supplement (https://www.mdpi.com/2311-7524/9/10/1144)
Supplement: s1 [file s1 › Leaf_Micronutrients_2020.xlsx]

## Sheet: Лист1
Table S1. Content of calcium and micronutrients in apple leaves in 2020, C treatment
	29.04.	04.05.	22.05.	06.06.	12.06.	17.06.	26.06.	06.07.	16.07.	27.07.	14.08.
Ca, % d.m.	0.96	0.91	1.01	1.12	0.62	1.29	0.81	0.72	0.81	1.12	1.01
Cu mg kg-1 d.m.	16.67	15.67	12.34	9.44	8.67	6.23	5.12	5.88	5.99	5.56	5.28
Fe mg kg-1 d.m.	30.95	108.34	108.34	122.45	80.09	251.32	146.29	89.92	180.81	425.98	296.28
Mn mg kg-1 d.m.	41.45	27.3	25.25	21.65	20.48	21.15	14.28	15.46	18.54	13.7	14.61
Zn mg kg-1 d.m.	22.55	40.26	26.61	15.46	17.13	10.81	8.51304	8.6	10.1478	14.93	18.49
Table S2. Content of calcium and micronutrients in apple leaves in 2020, T1 treatment
	29.04.	04.05.	22.05.	06.06.	12.06.	17.06.	26.06.	06.07.	16.07.	27.07.	14.08.
Ca, % d.m.	1.04	1.21	1.66	1.43	1.17	1.09	0.84	0.78	0.91	0.88	0.75
Cu mg kg-1 d.m.	14.88	12.35	9.02	7.43	4.74	5.87	5.57	5.25	5.35	4.965	5.12
Fe mg kg-1 d.m.	106.31	144.27	173.06	204.57	90.67	214.63	225.79	233.61	207.43	280.51	339.69
Mn mg kg-1 d.m.	39.16	37.84	60.2	17.32	15.38	19.92	14.42	12.37	13.83	15.96	13.69
Zn mg kg-1 d.m.	29.14	31.44	23.2	13.97	12.07	40.62	28.85	25.35	24.33	17.63	21.92
Table S3. Content of calcium and micronutrients in apple leaves in 2020, T2 treatment
	29.04.	04.05.	22.05.	06.06.	12.06.	17.06.	26.06.	06.07.	16.07.	27.07.	14.08.
Ca, % d.m.	0.87	1.09	1.03	0.87	0.85	0.75	0.86	0.98	0.87	0.87	0.81
Cu mg kg-1 d.m.	14.45	15.31	11.18	9.21	10.88	9.29	9.91	7.51	9.63	8.16	7.35
Fe mg kg-1 d.m.	64	124.26	113.76	128.57	104.09	203.89	153.6	94.42	189.85	447.28	311.09
Mn mg kg-1 d.m.	48.56	46.92	44.65	29.48	19.07	20.7	17.88	16.34	17.15	14.79	13.98
Zn mg kg-1 d.m.	29.14	41.44	23.2	13.97	12.07	40.62	28.85	25.35	24.33	17.63	21.92
Table S4. Content of calcium and micronutrients in apple leaves in 2020, T3 treatment
	29.04.	04.05.	22.05.	06.06.	12.06.	17.06.	26.06.	06.07.	16.07.	27.07.	14.08.
Ca, % d.m.	1.09	1.21	1.14	0.89	1.067	0.667	0.926	0.947	0.79	1.093	0.93
Cu mg kg-1 d.m.	13.89	11.34	9.29	6.17	5.09	5.89	5.27	5.52	6.58	5.66	5.06
Fe mg kg-1 d.m.	96.16	172.2	105.64	564.58	125.41	193.14	124.12	88.54	106.7	291.52	295.04
Mn mg kg-1 d.m.	45.9	43.24	33	41.05	28.35	25.82	32.55	19.74	37.15	17.79	14.55
Zn mg kg-1 d.m.	24.28	26.2	19.33	15.64	21.05	33.85	24.0417	21.12	20.27	14.69	18.26
Table S5. Content of calcium and micronutrients in apple leaves in 2020, T4 treatment
	29.04.	04.05.	22.05.	06.06.	12.06.	17.06.	26.06.	06.07.	16.07.	27.07.	14.08.
Ca, % d.m.	1.01	1.13	1.17	0.81	0.99	0.89	0.86	0.87	0.79	1.01	0.943
Cu mg kg-1 d.m.	12.98	9.87	8.29	5.96	3.99	5.65	7.87	5.04	6.35	5.02	5.72
Fe mg kg-1 d.m.	100.97	180.81	89.92	592.81	131.68	202.8	130.33	292.47	112.03	306.1	309.79
Mn mg kg-1 d.m.	24.67	22.13	21.9	20.05	17.48	20.78	31	18.8	35.38	16.95	17.67
Zn mg kg-1 d.m.	29.14	31.44	23.2	13.97	12.07	40.62	28.85	25.35	24.33	17.63	21.92
