# Supplementary material
Source: MDPI journal article supplement (https://www.mdpi.com/2311-7524/9/10/1144)
Supplement: s1 [file s1 › Leaf_Micronutrients_2021.xlsx]

## Sheet: Лист1
Table S6. Content of calcium and micronutrients in apple leaves in 2021, C treatment
	05.05.	23.05.	01.06.	14.06.	28.06.	08.07.	16.07.	25.07.	11.08.	10.09.
Ca, % d.m.	0.25	0.23	0.25	0.28	0.33	0.32	0.34	0.38	0.46	0.5
Cu mg kg-1 d.m.	5.84	5.36	5.42	5.13	4.48	4	3.97	3.38	4.24	5.2
Fe mg kg-1 d.m.	136.8	245.1	297.2	223.4	256.84	278.13	278.13	432.2	522.89	344.88
Mn mg kg-1 d.m.	24.55	22.76	21.2	22.45	21.22	20.9	27	28.09	18.67	13.4
Zn mg kg-1 d.m.	17.21	13.66	13.2	15.89	26.84	29.1	10.7	15.87	12.1	9.87
Table S7. Content of calcium and micronutrients in apple leaves in 2021, T1 treatment
	05.05.	23.05.	01.06.	14.06.	28.06.	08.07.	16.07.	25.07.	11.08.	10.09.
Ca, % d.m.	0.72	0.46	0.52	0.58	0.58	0.62	0.72	0.76	0.82	0.84
Cu mg kg-1 d.m.	6.25	5.74	5.62	4.44	3.89	3.78	4.86	5.09	4.22	3.99
Fe mg kg-1 d.m.	144.22	189.34	297.203	282.33	287.66	274.9	290.84	478.37	510.17	367.13
Mn mg kg-1 d.m.	23.23	18.76	19.1	22.32	23.44	21.7	15.8	13.22	15.88	14
Zn mg kg-1 d.m.	19.33	14.55	13	17.38	25.62	29.2	11	13.45	14.89	15.7
Table S8. Content of calcium and micronutrients in apple leaves in 2021, T2 treatment
	05.05.	23.05.	01.06.	14.06.	28.06.	08.07.	16.07.	25.07.	11.08.	10.09.
Ca, % d.m.	0.54	0.66	0.5	0.92	0.86	0.6	0.76	1.16	1.3	1.06
Cu mg kg-1 d.m.	5.78	5.38	5.04	6.78	8.44	14.8	4.21	5.82	4.23	4
Fe mg kg-1 d.m.	166.53	199.22	289.56	271.47	262.34	267.48	288.35	387.61	475.207	322.1
Mn mg kg-1 d.m.	19.86	23.55	17.8	23.41	22.89	21	29	23.09	19.09	17.21
Zn mg kg-1 d.m.	14.45	24.45	26	34.71	43.74	47	32.2	28.48	15.66	18.8
Table S9. Content of calcium and micronutrients in apple leaves in 2021, T3 treatment
	05.05.	23.05.	01.06.	14.06.	28.06.	08.07.	16.07.	25.07.	11.08.	10.09.
Ca, % d.m.	0.88	0.64	0.5	0.66	0.64	0.624	0.728	0.86	0.94	1.04
Cu mg kg-1 d.m.	5.66	5.08	5.6	4.78	4.39	4.14	3.77	3.99	4.56	4.99
Fe mg kg-1 d.m.	158.8	224.35	295.61	344.78	412.87	516.52	274.95	517.89	548.31	313.09
Mn mg kg-1 d.m.	22.34	45.87	28.9	33.67	45.32	54	37.85	28.45	25.77	27.9
Zn mg kg-1 d.m.	15.04	28.33	25.3	22.43	24.58	28	16.7	13.56	8.78	9.9
Table S10. Content of calcium and micronutrients in apple leaves in 2021, T4 treatment
	05.05.	23.05.	01.06.	14.06.	28.06.	08.07.	16.07.	25.07.	11.08.	10.09.
Ca, % d.m.	0.74	0.64	0.5	0.8	0.76	0.62	0.7	1.1	0.8	0.82
Cu mg kg-1 d.m.	6.08	5.46	5.31	7.24	8.87	14.65	6.12	4.08	3.84	3.99
Fe mg kg-1 d.m.	133.98	212.34	297.2	322.42	389.87	427.741	274.952	443.68	529.24	311.5
Mn mg kg-1 d.m.	18.56	17.83	18.8	45.44	44.32	43	35	23.65	16.23	23.48
Zn mg kg-1 d.m.	13.43	21.45	25.35	28.83	37.98	46.3	41.03	23.56	16.88	12.07
