# Supplementary material
Source: MDPI journal article supplement (https://www.mdpi.com/2311-7524/9/10/1144)
Supplement: s1 [file s1 › Leaf_Micronutrients_2022.xlsx]

## Sheet: Лист1
Table S11. Content of calcium and micronutrients in apple leaves in 2022, C treatment
	02.05.	16.05.	29.05.	13.06.	24.06.	04.07.	16.07.	05.08.
Ca, % d.m.	0.94	1	1.1	1.11	1.52	1.24	1.47	1.39
Cu mg kg-1 d.m.	11.37	10.33	9.83	6.87	5.56	6.26	7.19	6.13
Fe mg kg-1 d.m.	244.1	367.8	353.91	321.94	330.15	448.95	334.23	354.16
Mn mg kg-1 d.m.	93.28	86.19	84.19	76.85	59.52	55.71	70.95	68.76
Zn mg kg-1 d.m.	28.22	17.76	20.04	17.52	19.8095	16.619	32.8095	17.19
Table S12. Content of calcium and micronutrients in apple leaves in 2022, T1 treatment
	02.05.	16.05.	29.05.	13.06.	24.06.	04.07.	16.07.	05.08.
Ca, % d.m.	0.75	0.91	0.95	1.24	1.38	1.13	1.34	1.73
Cu mg kg-1 d.m.	7.34	9.39	8.93	6.24	5.05	5.69	6.53	5.57
Fe mg kg-1 d.m.	337.89	404.58	379.3	367.13	364.12	476.8	360.65	399.56
Mn mg kg-1 d.m.	144.5	108.8	102.6	80.53	61.47	54.28	78.04	69.63
Zn mg kg-1 d.m.	38.47	36.03	25.04	18.27	21.79	18.281	28.0905	18.9
Table S13. Content of calcium and micronutrients in apple leaves in 2022, T2 treatment
	02.05.	16.05.	29.05.	13.06.	24.06.	04.07.	16.07.	05.08.
Ca, % d.m.	0.67	0.97	1.22	1.18	1.322	1.19	1.17	1.41
Cu mg kg-1 d.m.	7.96	8.94	8.5	5.94	4.8	5.41	6.21	5.3
Fe mg kg-1 d.m.	293.46	360.93	332.85	319.83	354.96	414.74	292.55	344.59
Mn mg kg-1 d.m.	124.45	112.19	94.71	76.69	61.54	51.69	70.32	61.3143
Zn mg kg-1 d.m.	23.56	29.63	59.21	42.23	44.4	33.53	24.47	17.44
Table S14. Content of calcium and micronutrients in apple leaves in 2022, T3 treatment
	02.05.	16.05.	29.05.	13.06.	24.06.	04.07.	16.07.	05.08.
Ca, % d.m.	0.92	0.95	1.4525	1.27	1.01	0.98	1.242	1.48
Cu mg kg-1 d.m.	13.44	18.91	9.59	17.15	10.39	7.64	17.38	7.02
Fe mg kg-1 d.m.	322.76	344.88	368.12	377.59	398.11	614.11	306.64	765.03
Mn mg kg-1 d.m.	84.27	136.66	111.26	97.42	105.52	81.71	78.38	74.21
Zn mg kg-1 d.m.	14.55	39.42	21.86	19.64	23.46	21.28	43.94	23.62
Table S15. Content of calcium and micronutrients in apple leaves in 2022, T4 treatment
	02.05.	16.05.	29.05.	13.06.	24.06.	04.07.	16.07.	05.08.
Ca, % d.m.	0.77	0.83	1.35	1.1	0.88	0.87	1.08	1.26
Cu mg kg-1 d.m.	12.34	16.45	11.82	16.22	9.3	6.65	16.42	6.11
Fe mg kg-1 d.m.	244.4	344.88	340.11	368.72	352.83	573.74	324.22	877.3
Mn mg kg-1 d.m.	78.88	102.5	102.2	91.3	110.8	85.8	73.9	63.7
Zn mg kg-1 d.m.	21.34	37.8	51.7	49.7	90.3	39	31.3	16.6
