# Supplementary material
Source: MDPI journal article supplement (https://www.mdpi.com/2311-7524/9/10/1144)

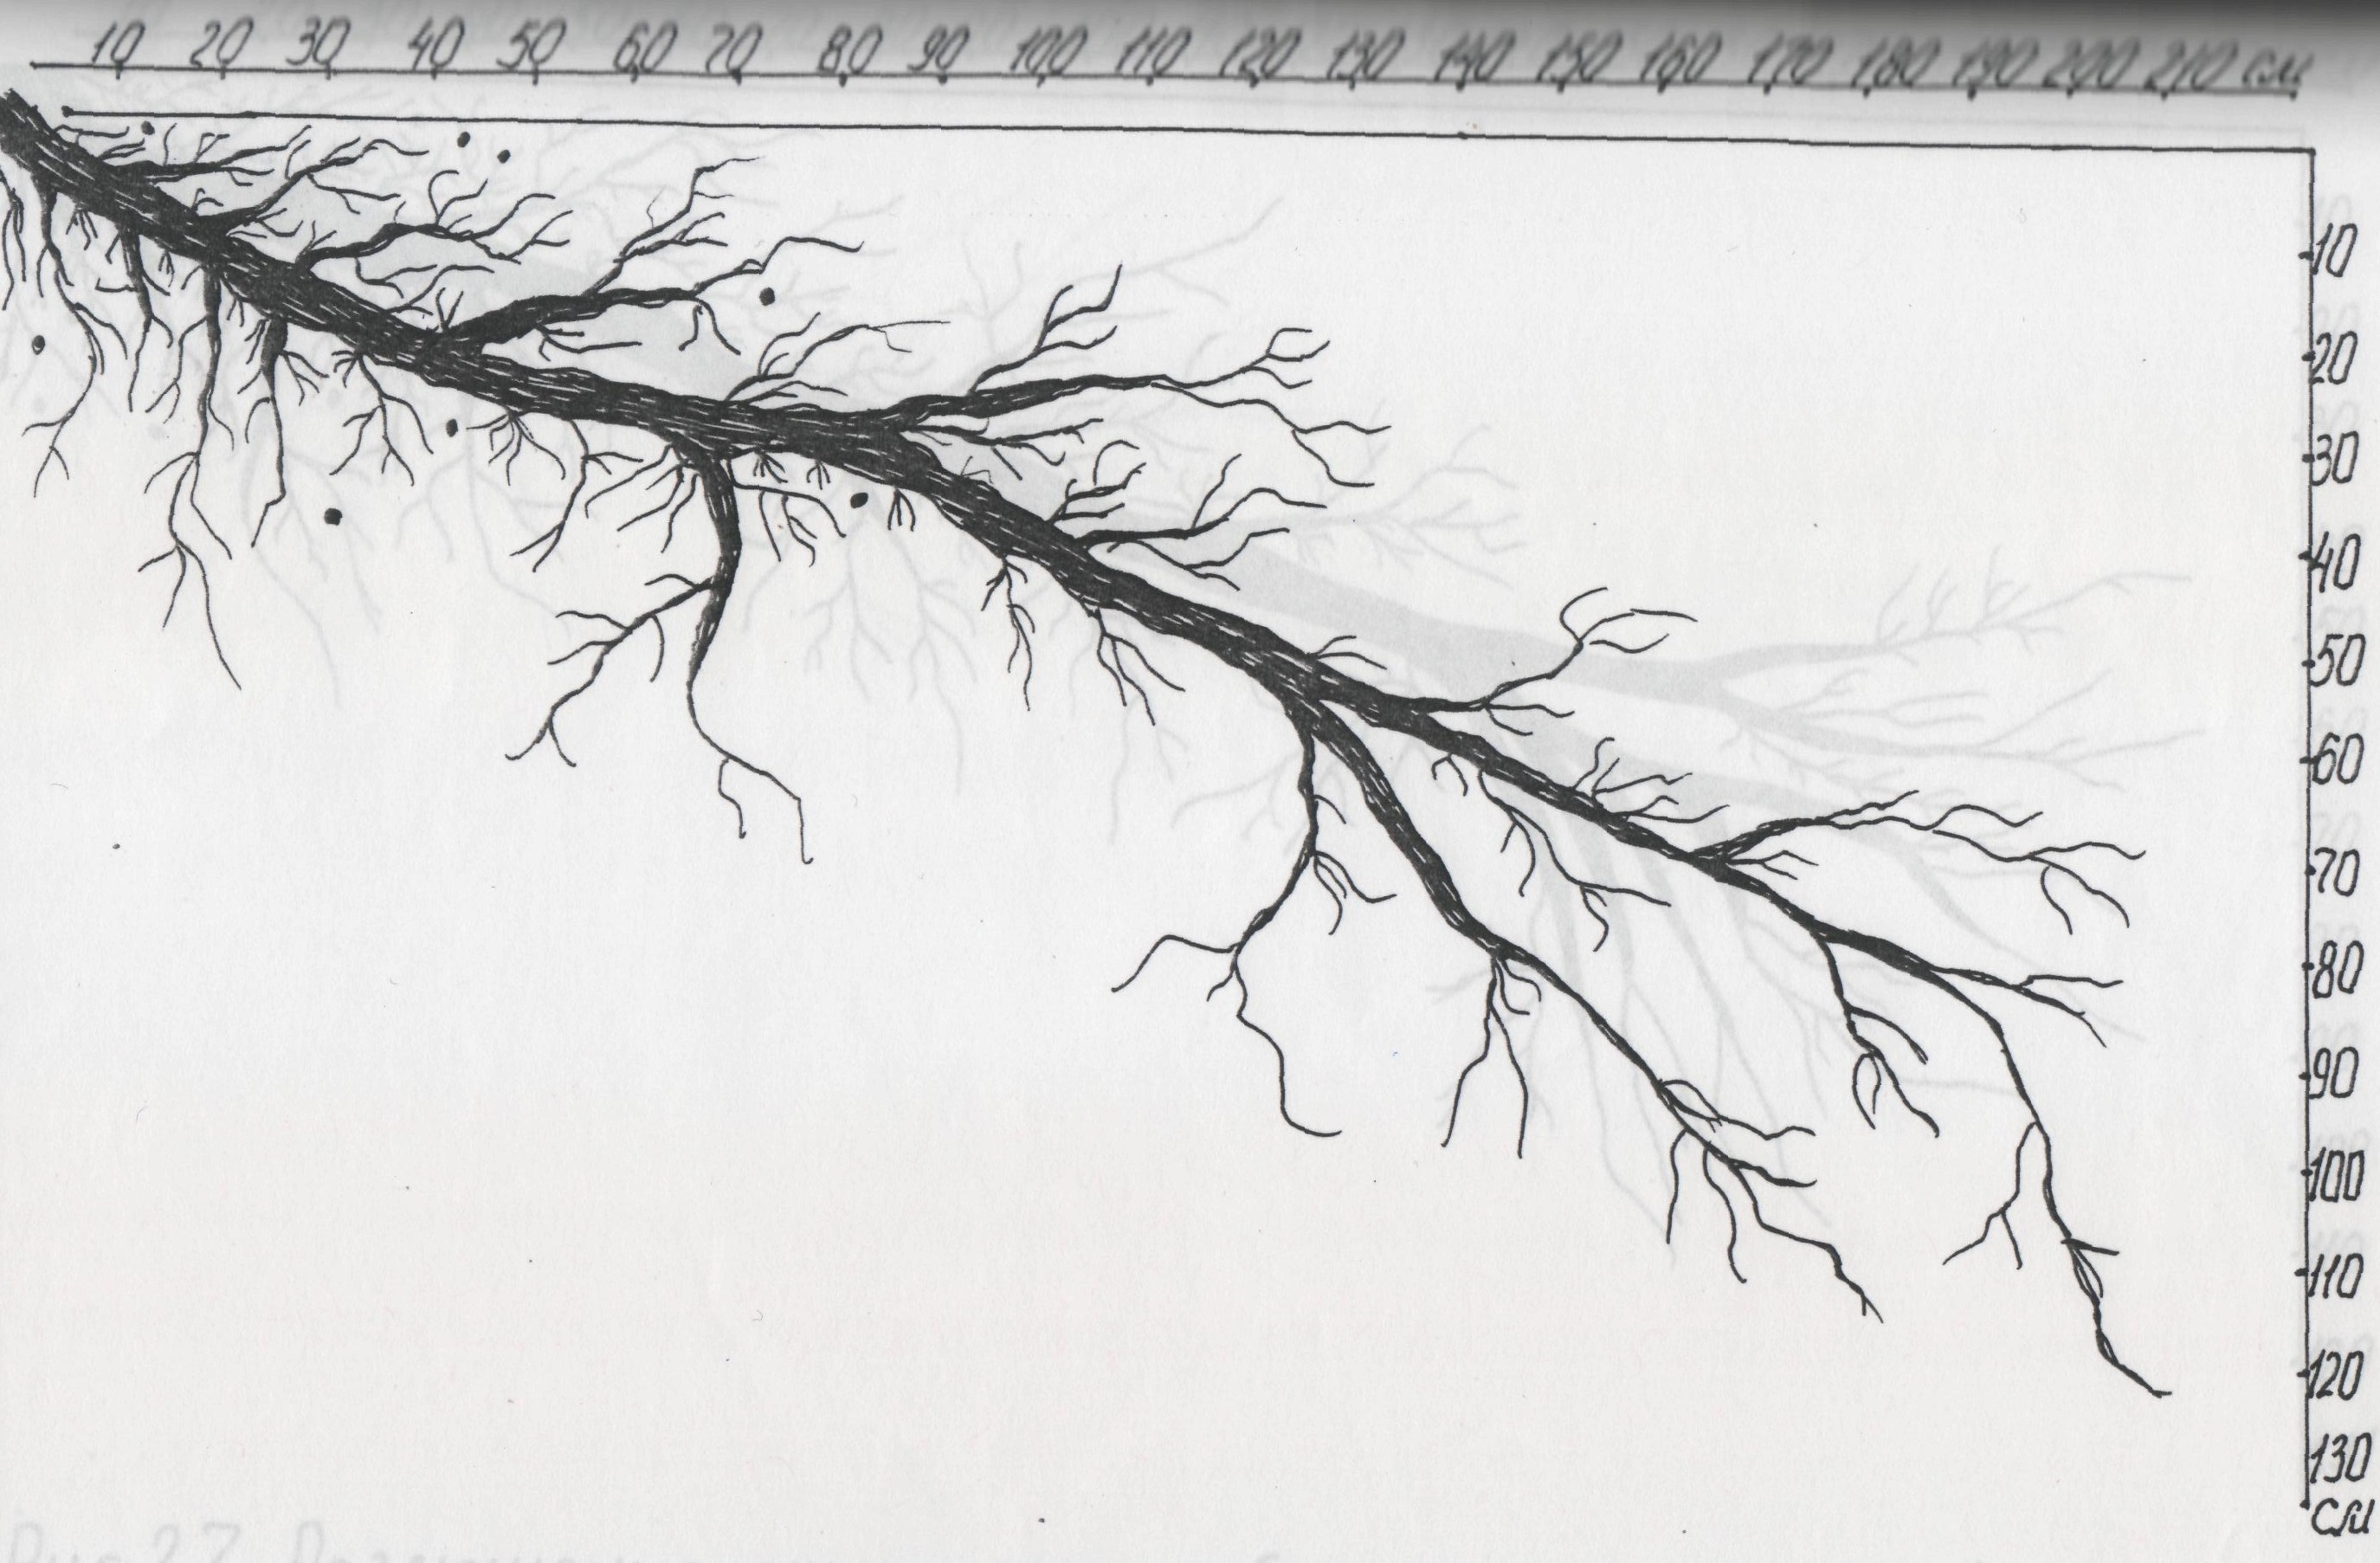

Supplement: s1 [file s1 › Fig_S1_Wealthy_B118_root.jpg]

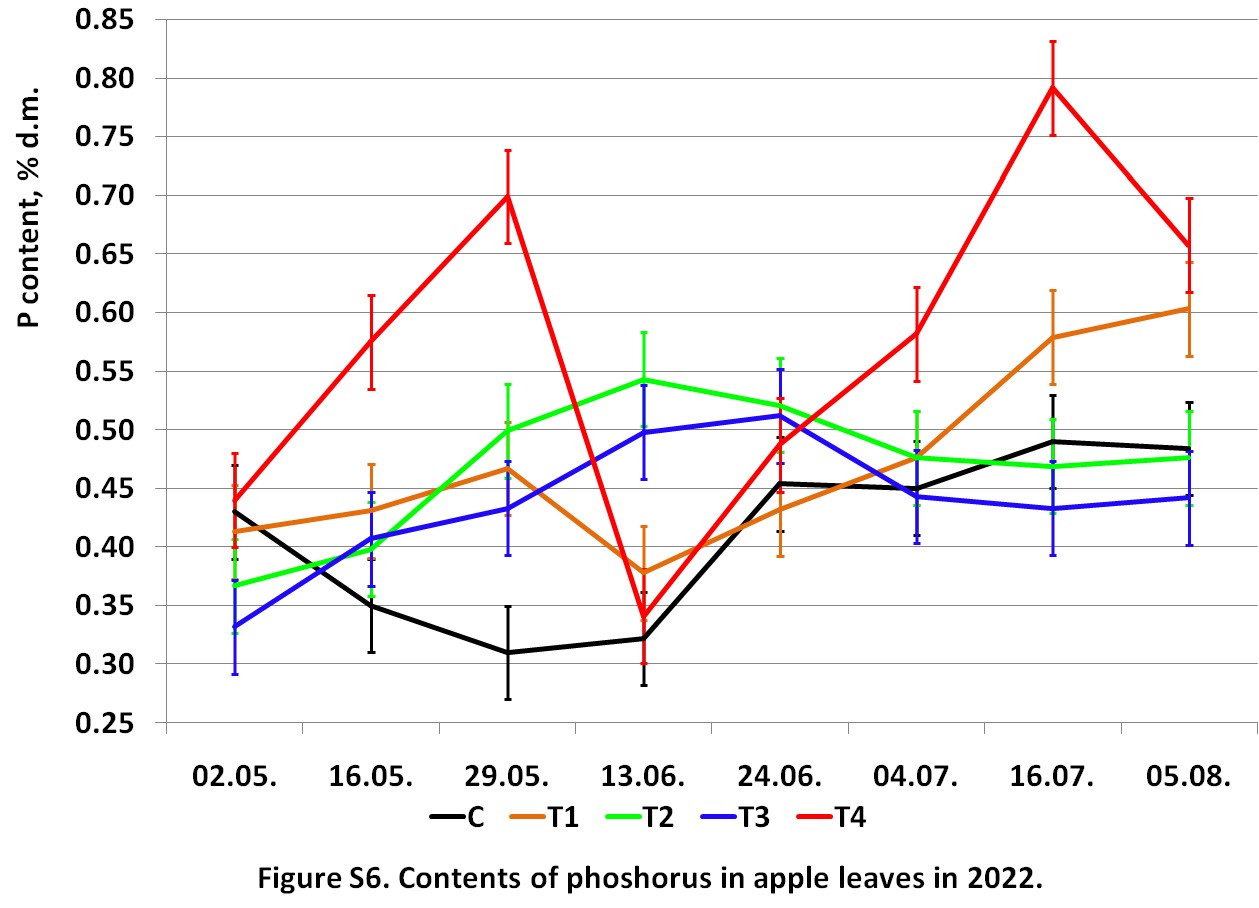

Supplement: s1 [file s1 › Fig_S10_P_contents_2022.jpg]

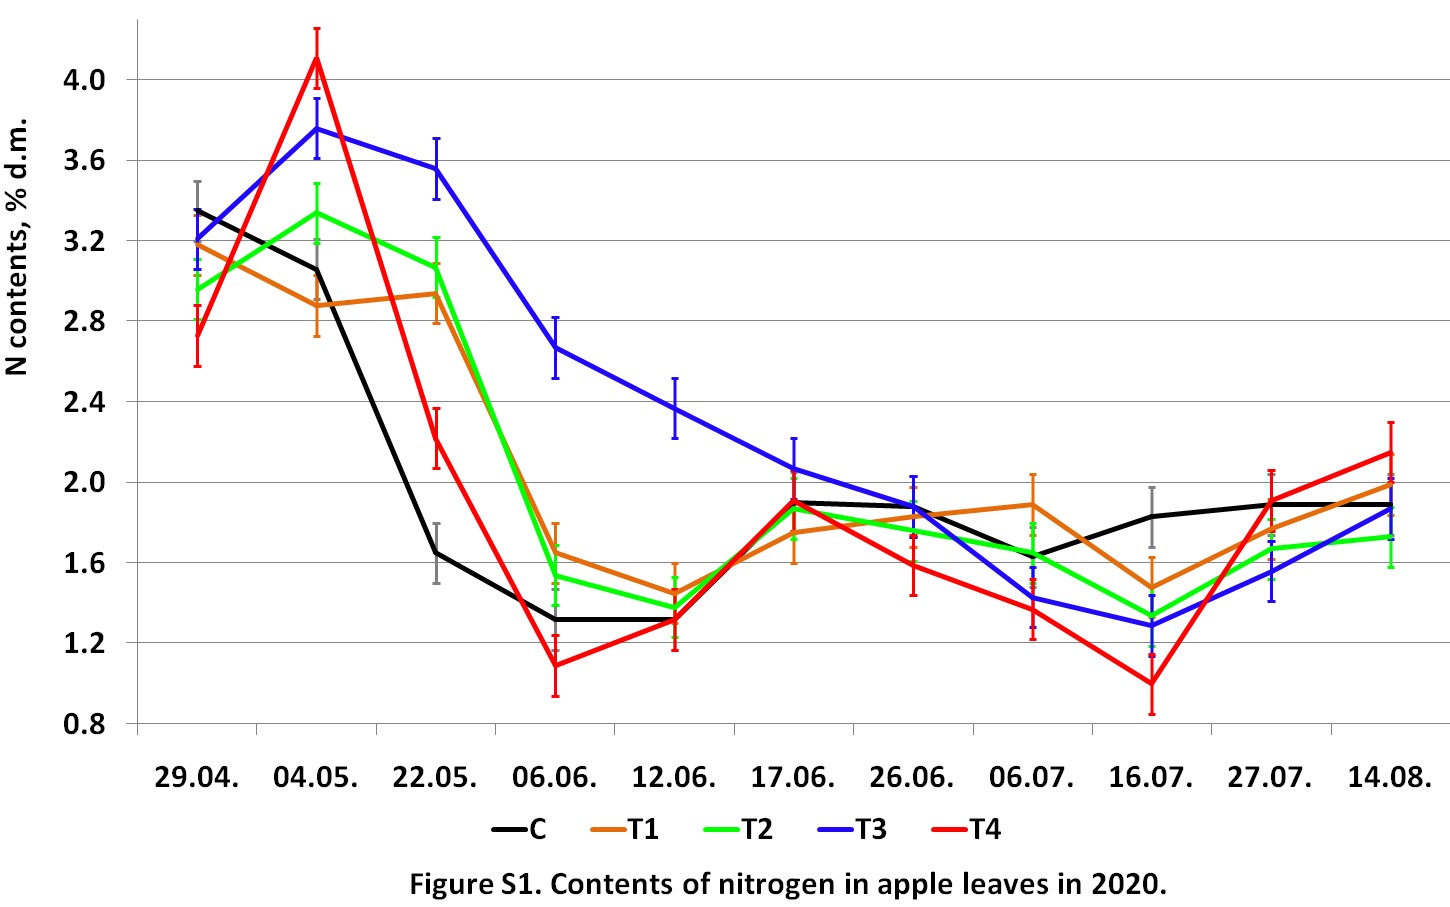

Supplement: s1 [file s1 › Fig_S2_N_contents_2020.jpg]

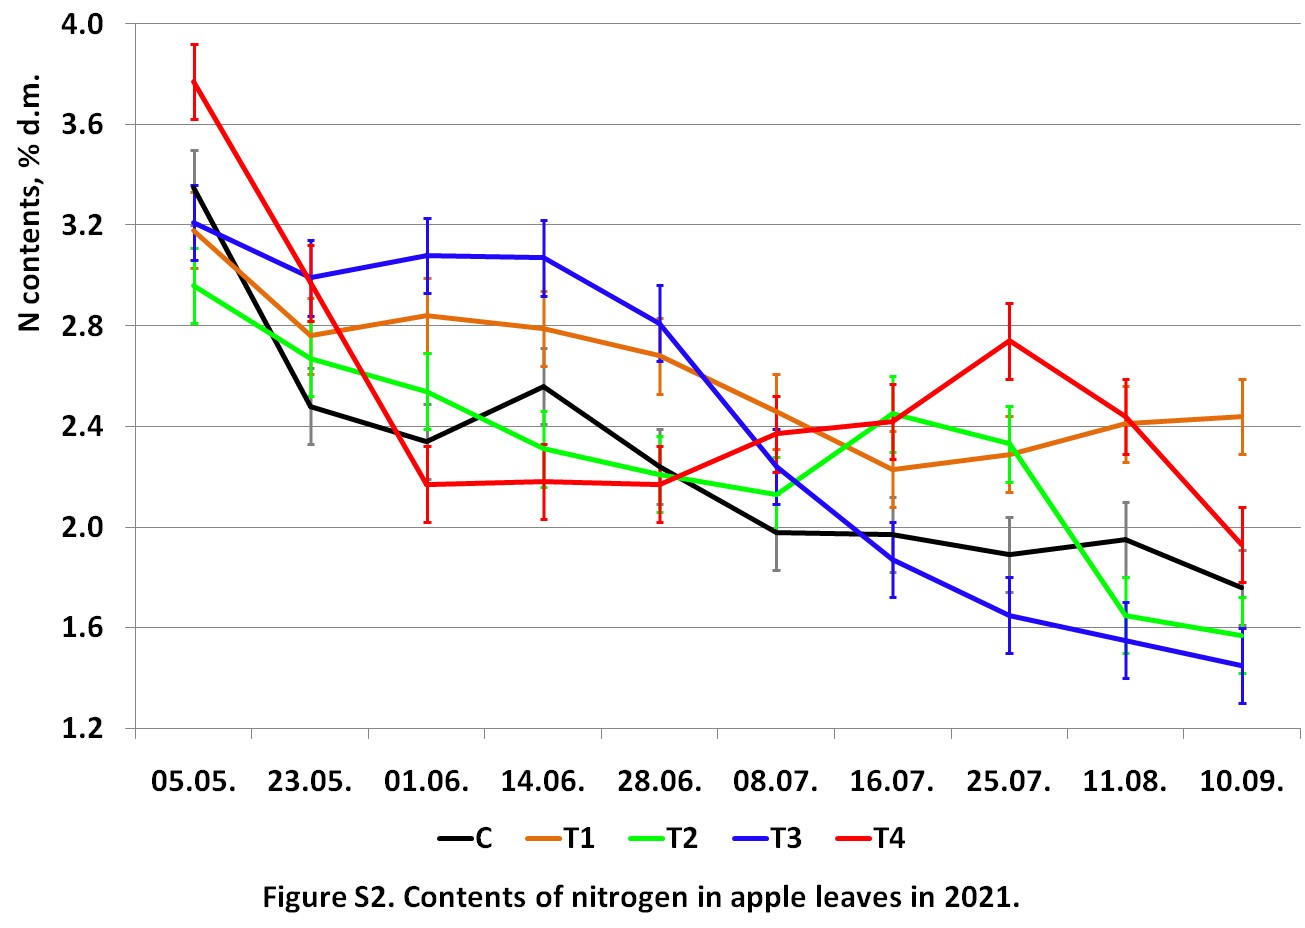

Supplement: s1 [file s1 › Fig_S3_N_contents_2021.jpg]

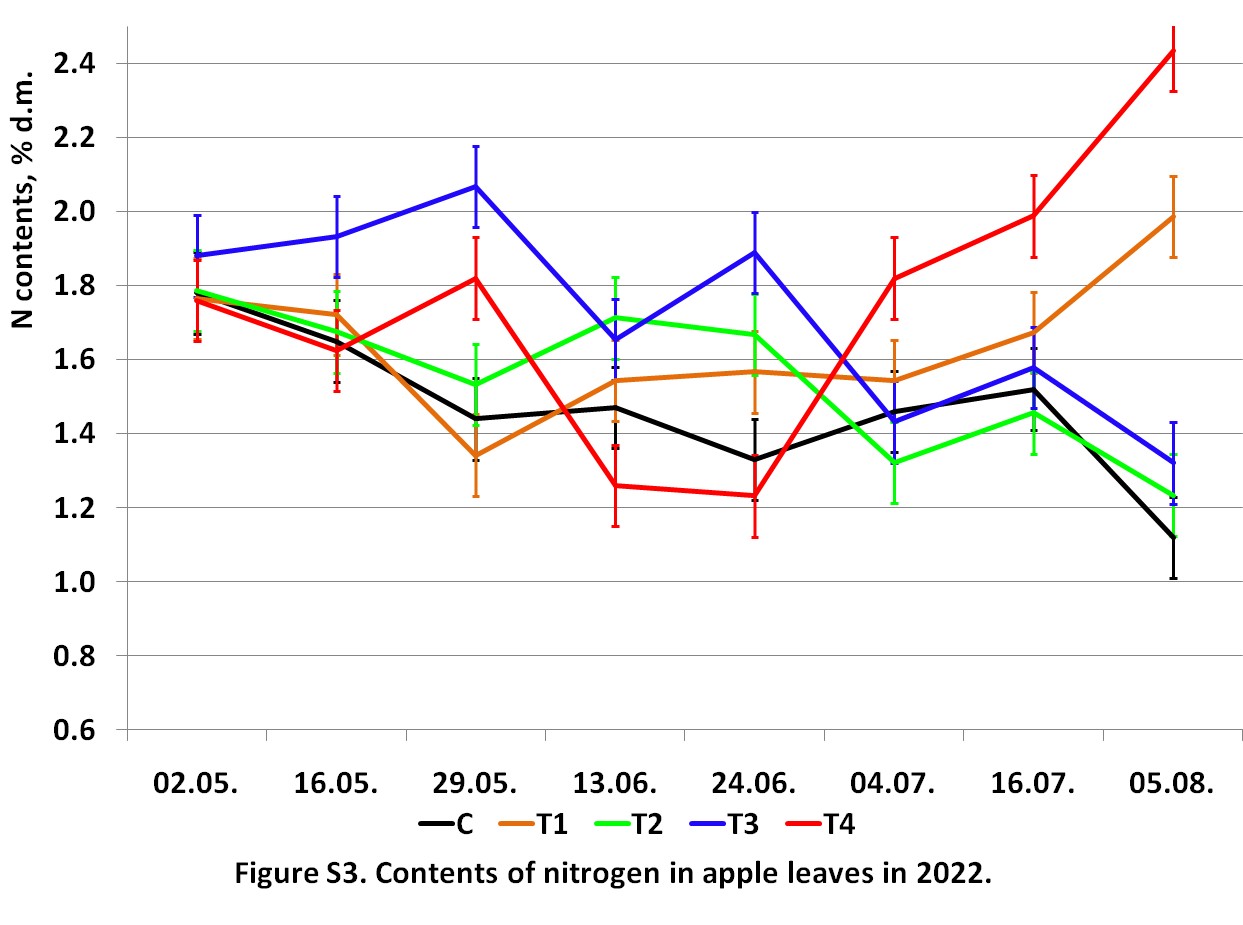

Supplement: s1 [file s1 › Fig_S4_N_contents_2022.jpg]

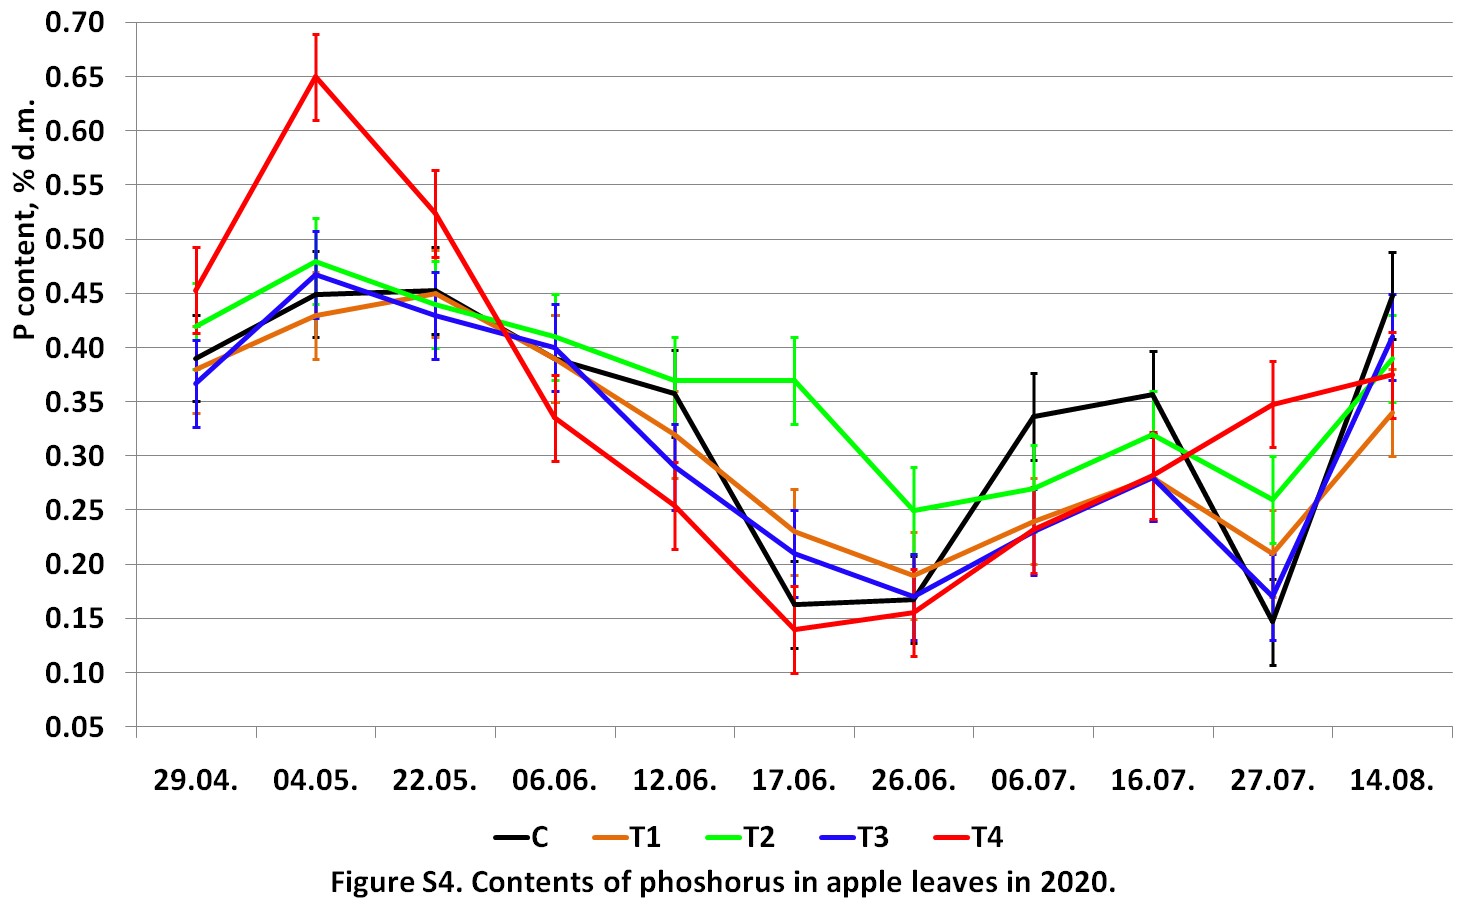

Supplement: s1 [file s1 › Fig_S5_P_contents_2020.jpg]

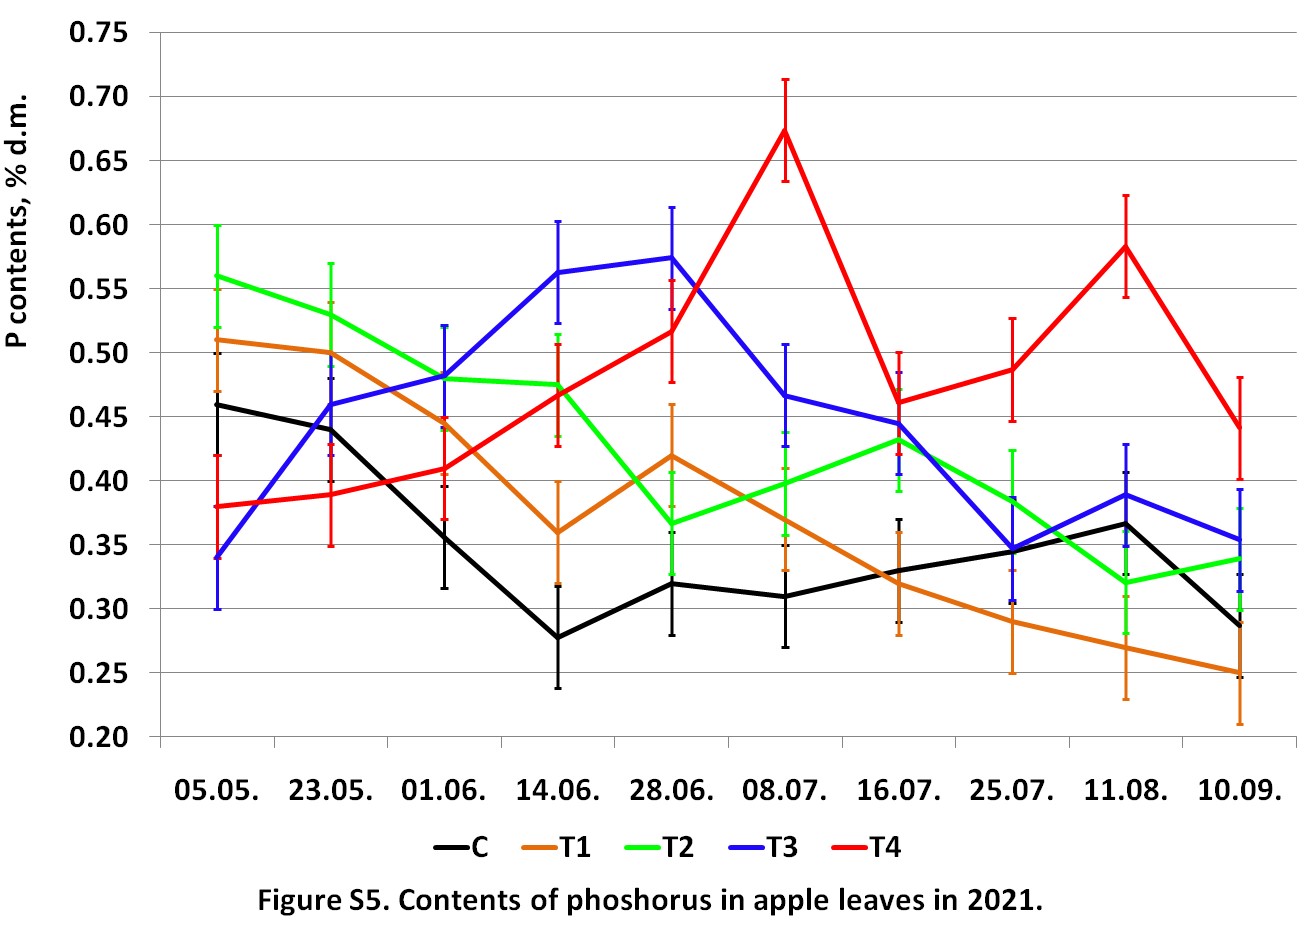

Supplement: s1 [file s1 › Fig_S6_P_contents_2021.jpg]

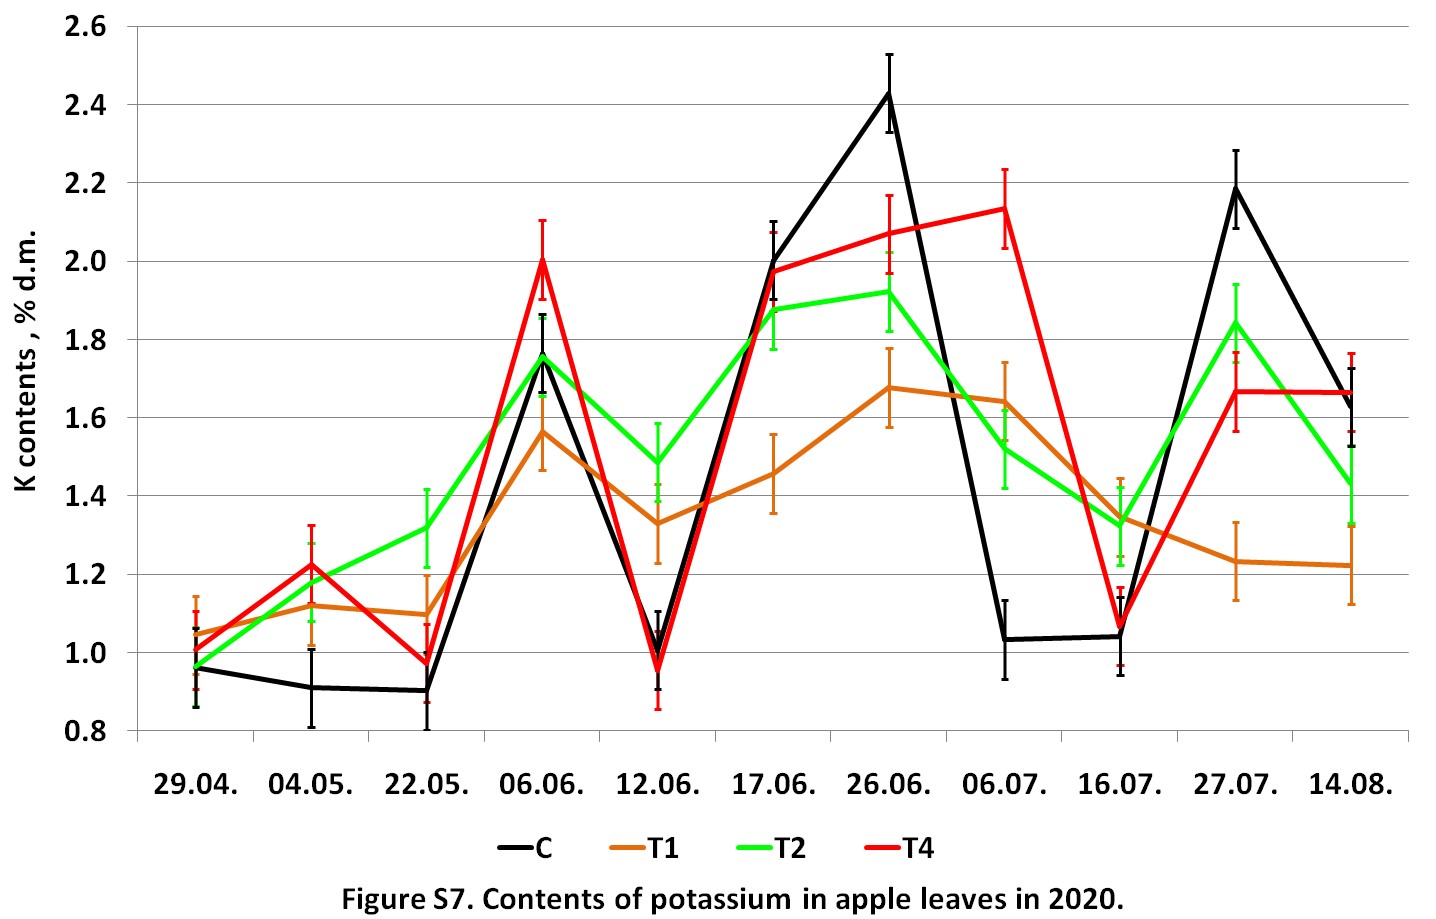

Supplement: s1 [file s1 › Fig_S7_K_contents_2020.jpg]

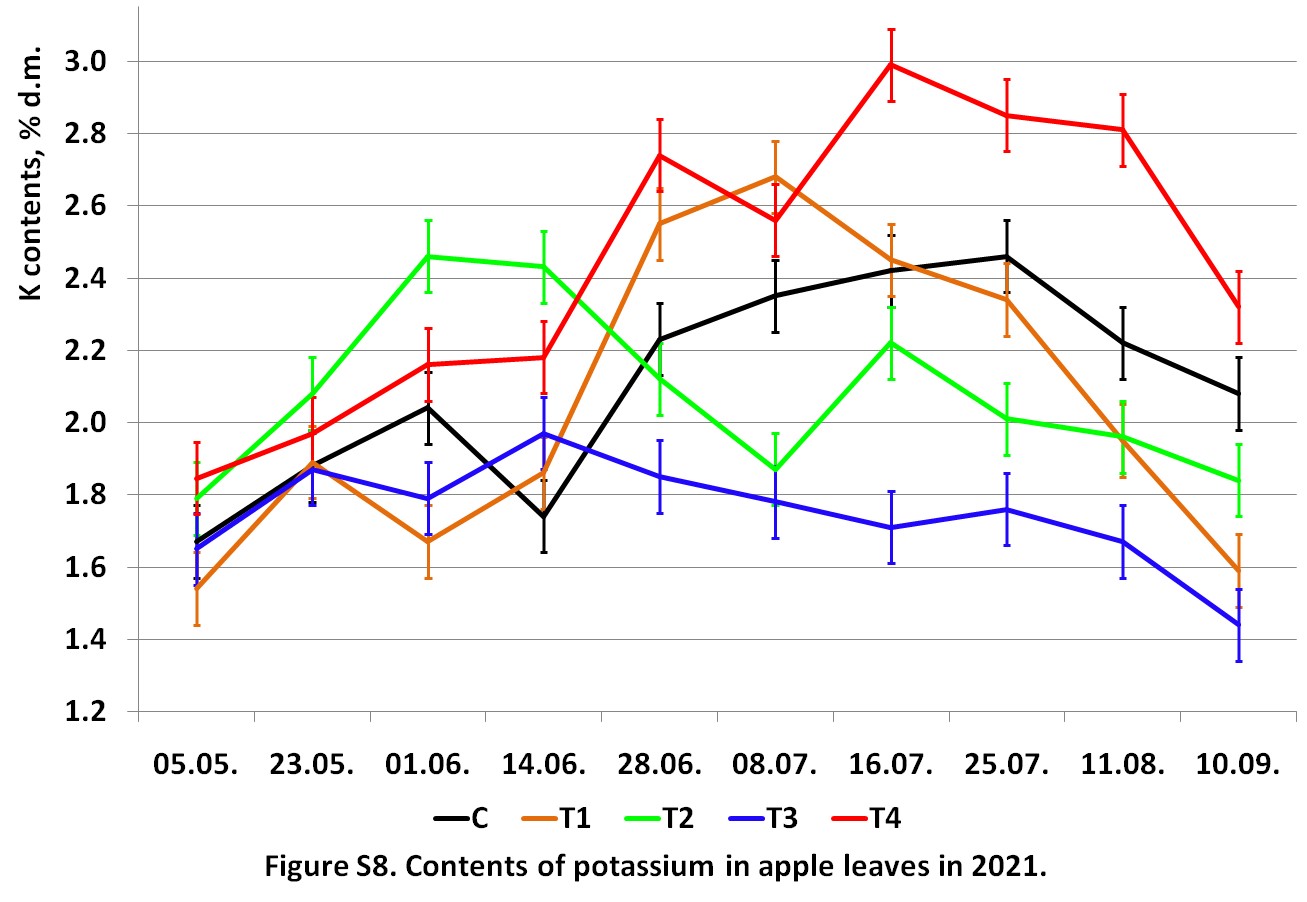

Supplement: s1 [file s1 › Fig_S8_K_contents_2021.jpg]

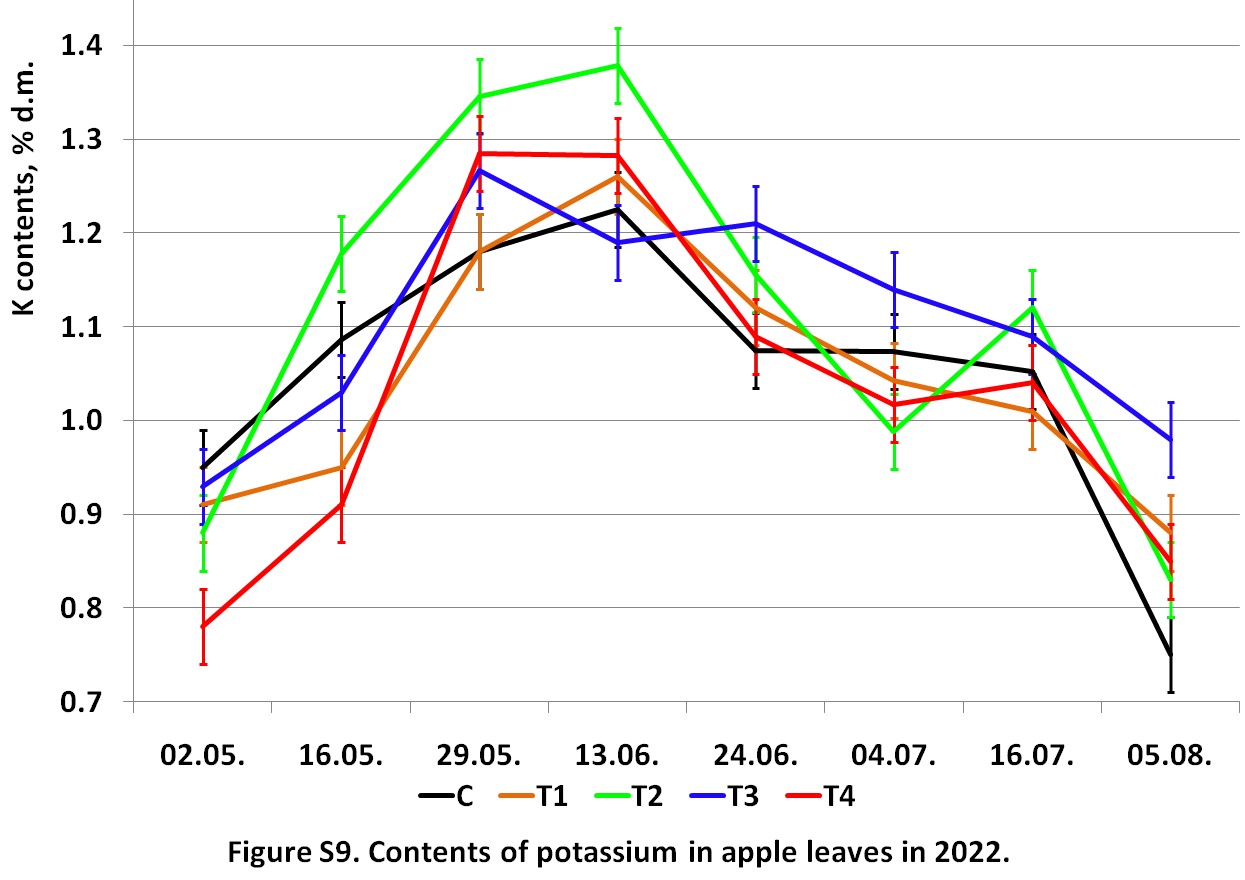

Supplement: s1 [file s1 › Fig_S9_K_contents_2022.jpg]
